# Supplementary material
Source: MDPI journal article supplement (https://www.mdpi.com/2073-4352/13/11/1594)
Supplement: s1 [file s1]

# **A Fibrous Perovskite Nanomaterial with Exsolved Ni-Cu Metal nanoparticles as an Effective Composite Catalyst for External Steam Reforming of Liquid Alcohols**

Tong Wei\*<sup>1,2</sup>, Juan Wang<sup>1</sup>, Yangbo Jia<sup>2</sup>, Tatsukuni Harimoto<sup>1</sup>

1. Tianneng Holding Group, 18 Baoqiao Road, Huaxi Street, Huzhou, Zhejiang, 313100, China.

2. School of Materials Science & Engineering, Zhejiang SCI-TECH University, Hangzhou, Zhejiang 310018, China.

E-mail: [weit@zstu.edu.cn](mailto:weit@zstu.edu.cn)

## Supporting Figures

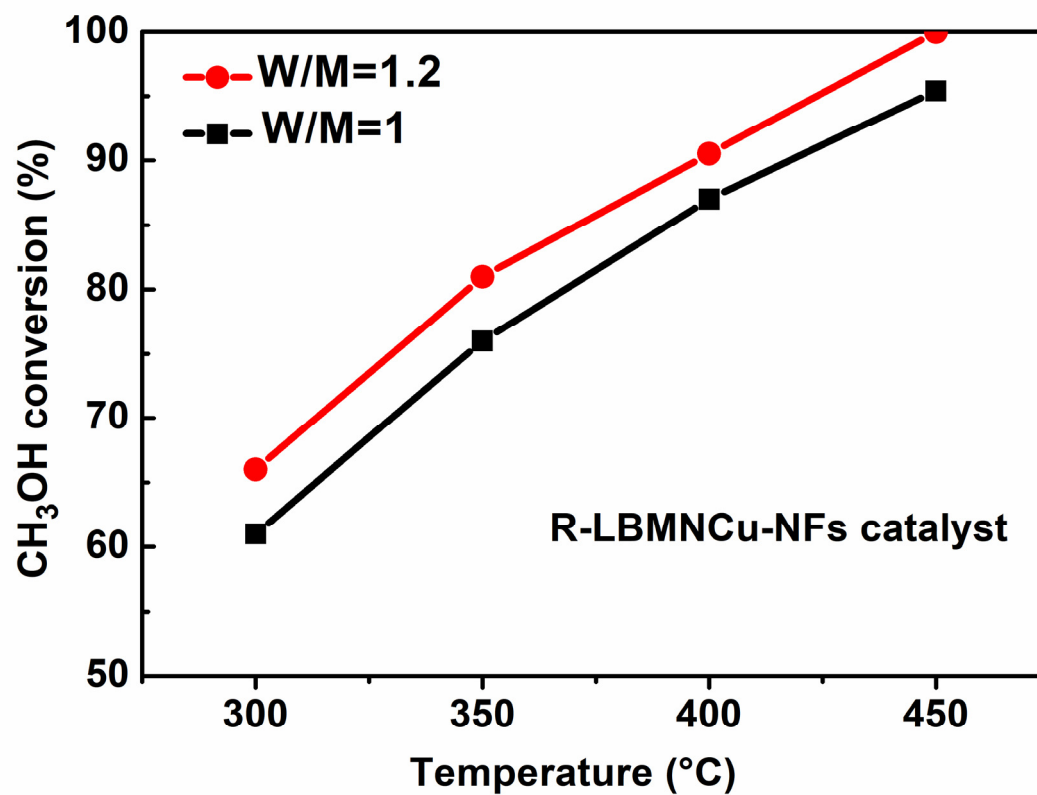

Figure S1. CH<sub>3</sub>OH conversion vs temperature and W/M ratio for MSR reaction in the Re-LBMNCu-NFs catalyst system.

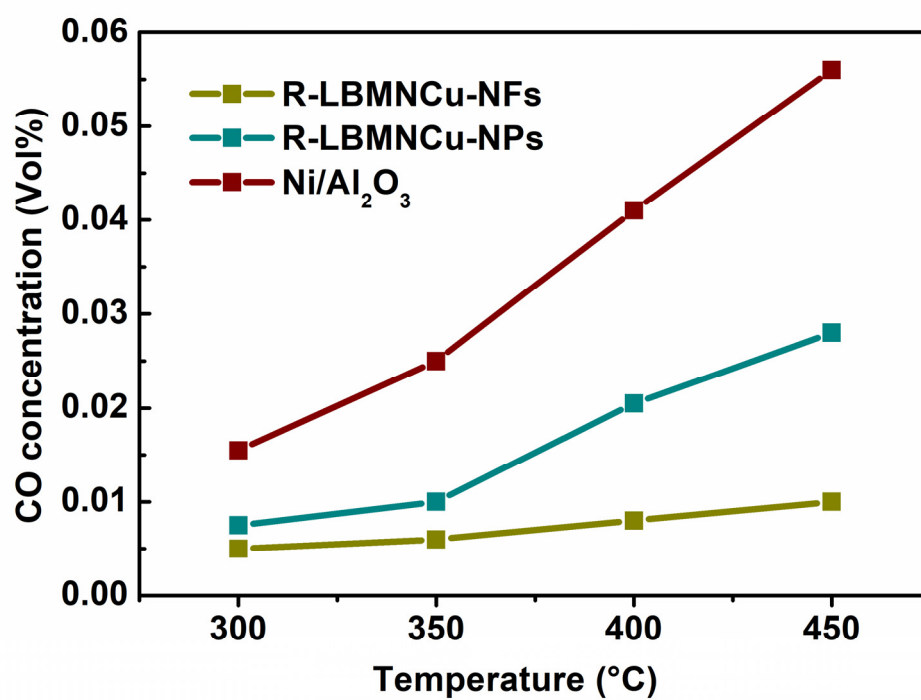

Figure S2. The profiles of CO molar concentration in the gaseous products of MSR as a function of the reforming temperature with 1.2 W/M ratio for R-LBMNCu-NFs, R-LBMNCu-NFs and Ni-Cu/Al<sub>2</sub>O<sub>3</sub> catalysts catalysts.

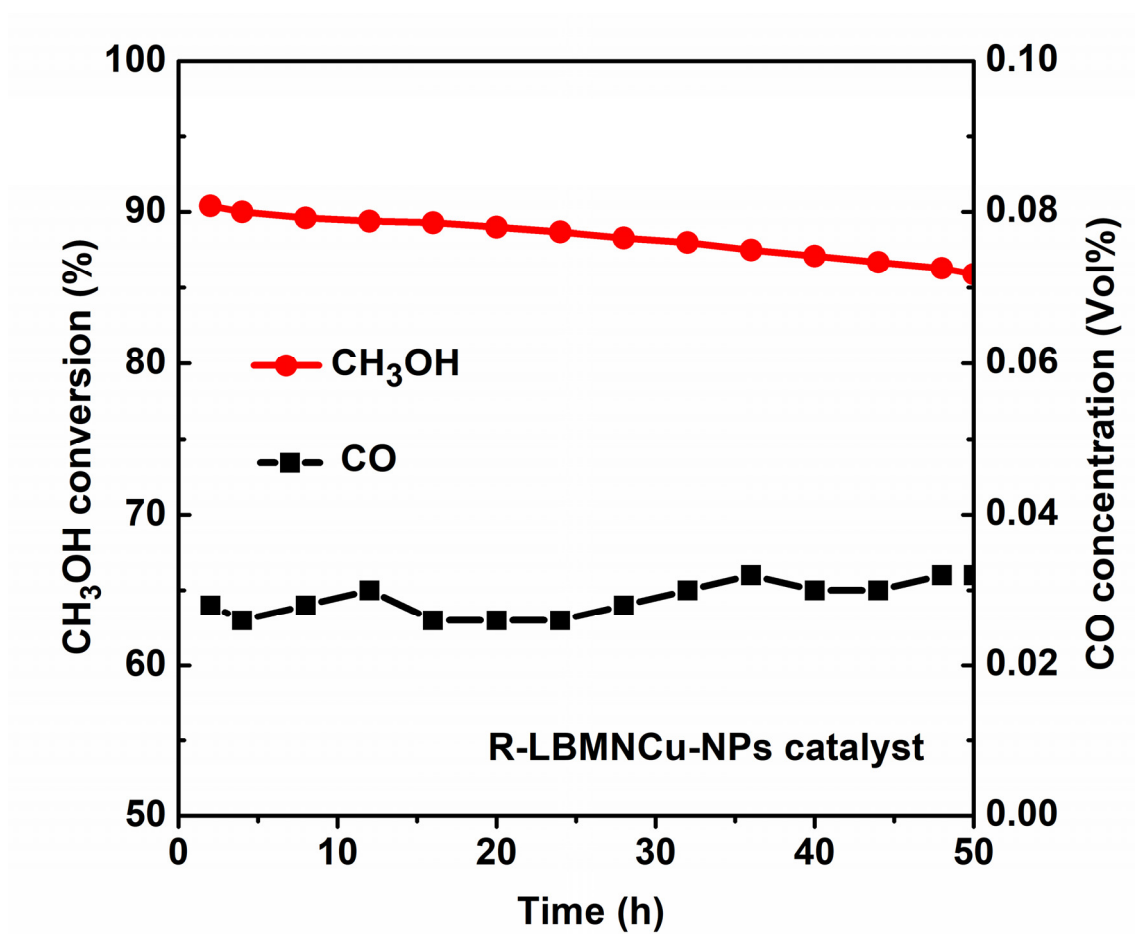

Figure S3. CH<sub>3</sub>OH conversion and CO molar concentration of R-LBMNCu-NPs catalysts vs time on stream for MSR reaction at 450 °C with a W/M ratio of 1.2.

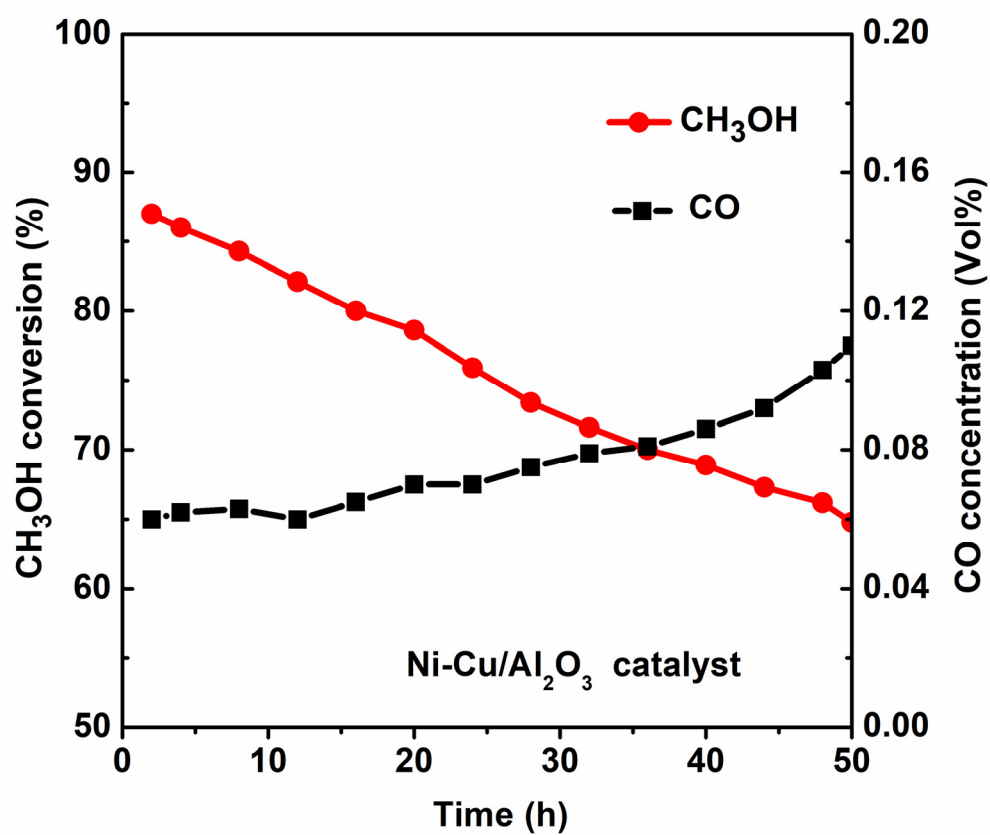

Figure S4. CH<sub>3</sub>OH conversion and CO molar concentration of Ni-Cu/Al<sub>2</sub>O<sub>3</sub> catalysts vs time on stream for MSR reaction at 450 °C with a W/M ratio of 1.2.

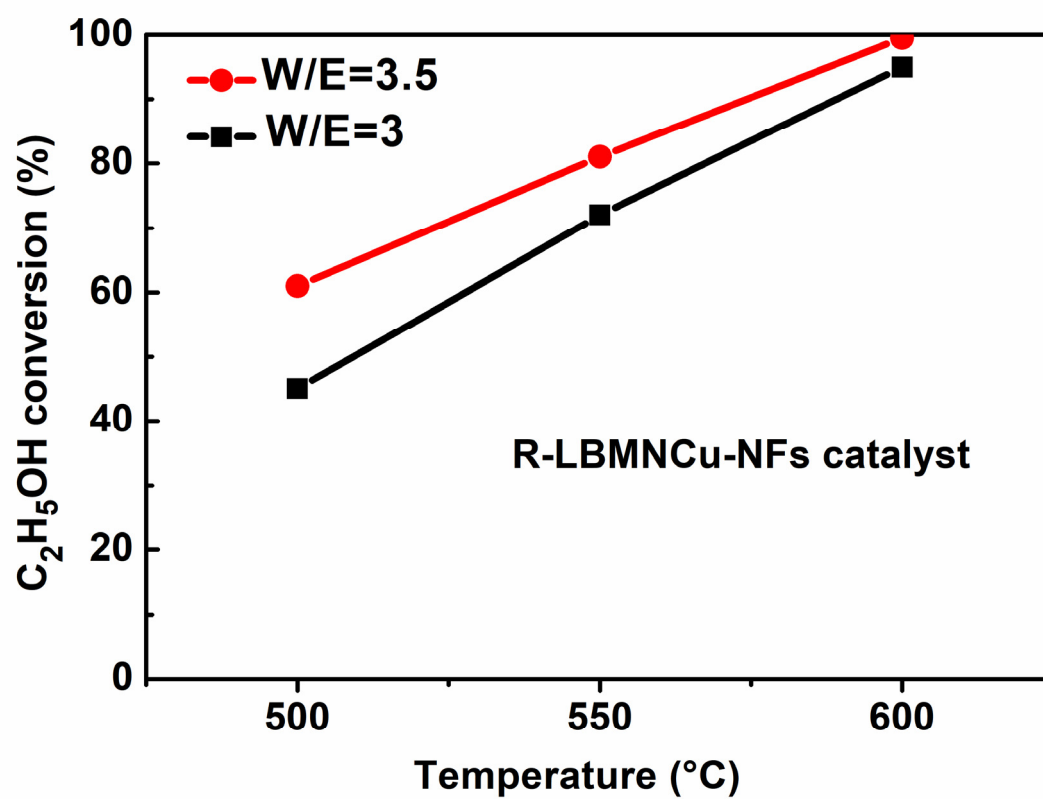

Figure S5.  $C_2H_5OH$  conversion vs temperature and W/E ratio for ESR reaction in the R-LBMNCu-NFs catalyst system.

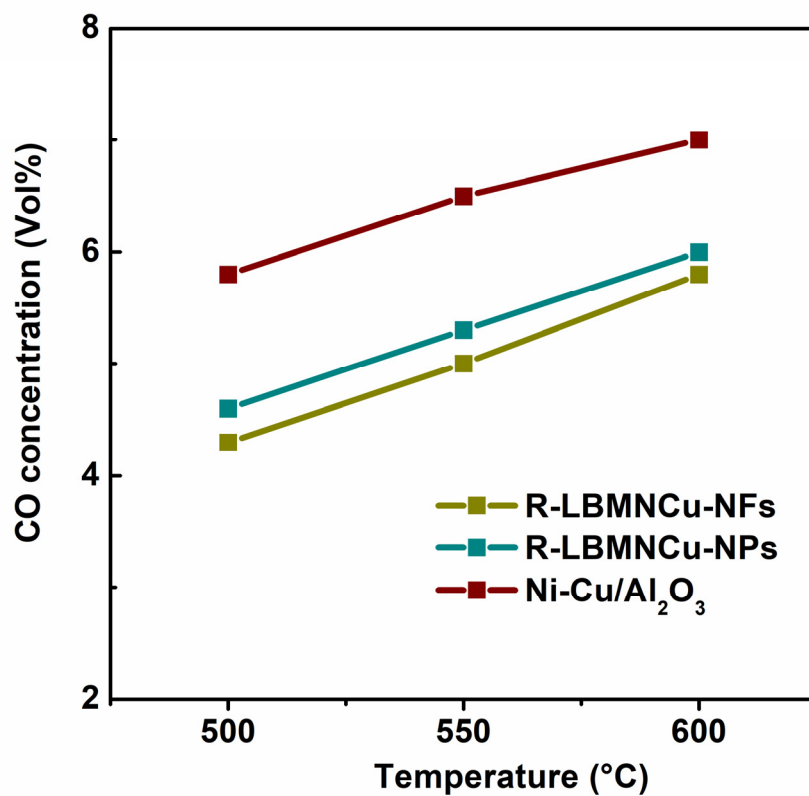

Figure S6. The profiles of CO molar concentration in the gaseous products of ESR as a function of the reforming temperature with 3.5 W/E ratio for R-LBMNCu-NFs, R-LBMNCu-NFs and Ni-Cu/Al<sub>2</sub>O<sub>3</sub> catalysts catalysts.

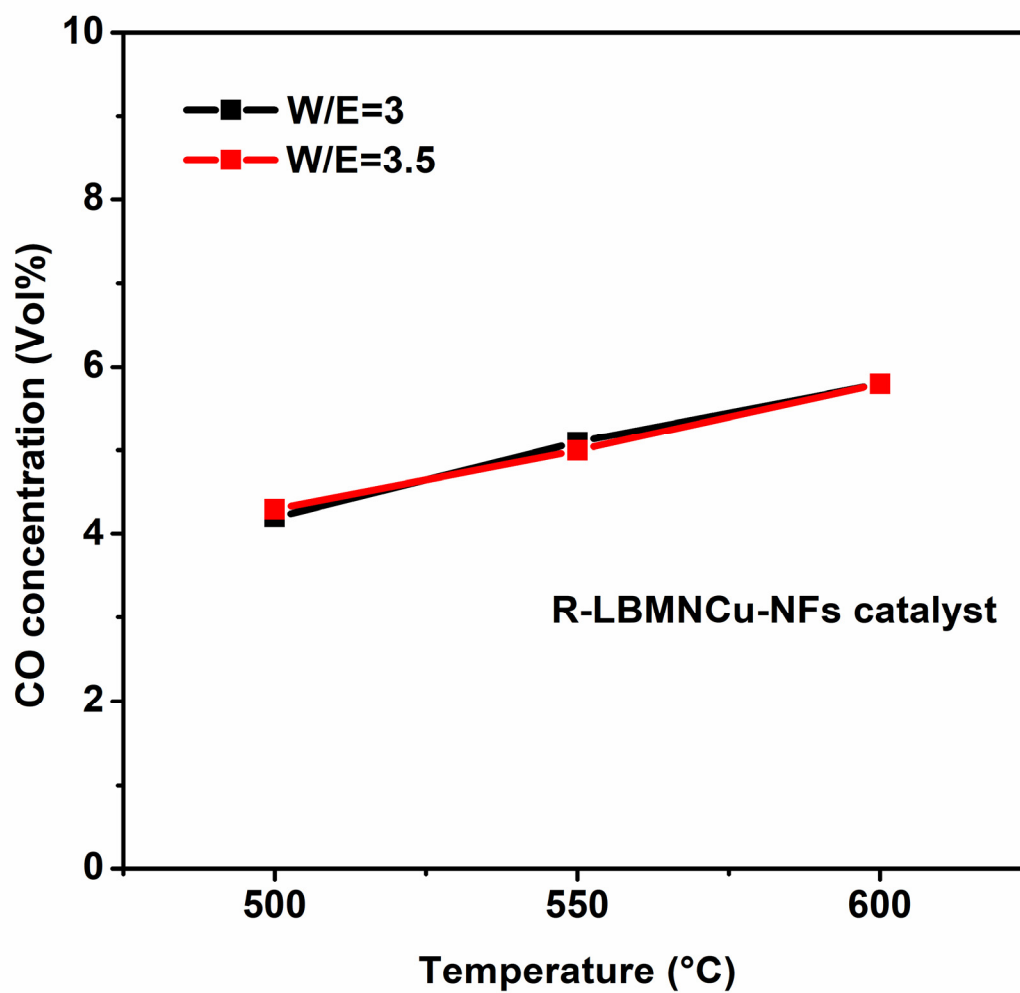

Figure S7. The profiles of CO molar concentration in the gaseous products as a function of the W/E ratio for ESR reaction in the R-LBMNCu-NFs catalyst system.



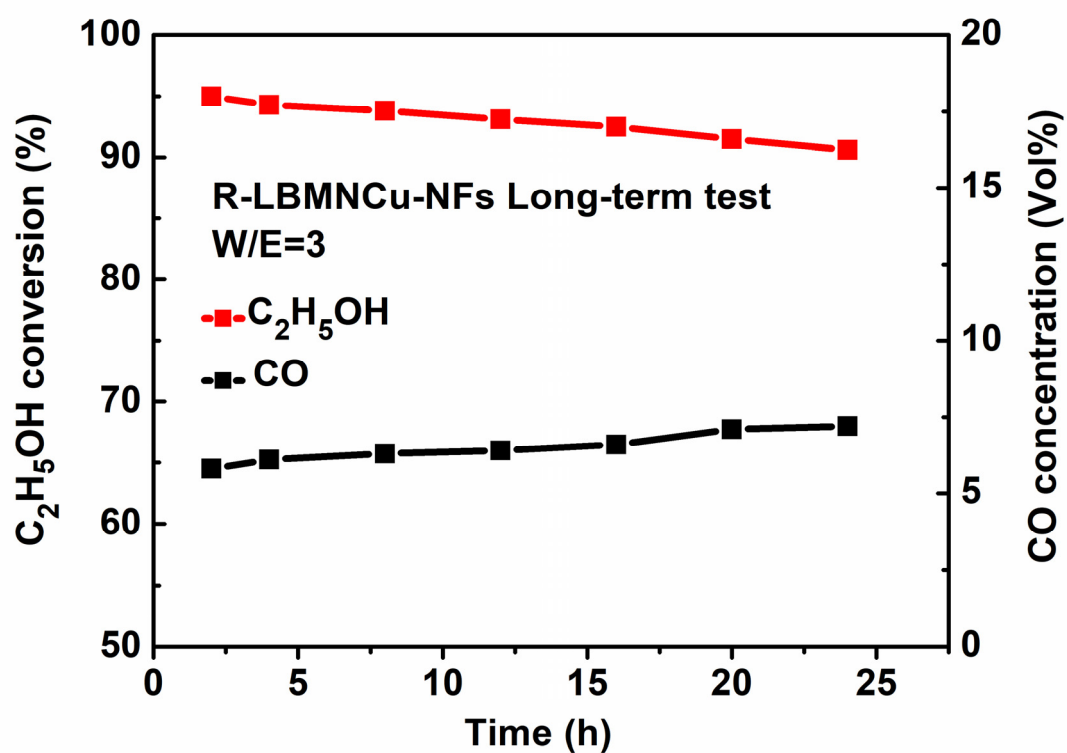

Figure S8. The profiles of  $C_2H_5OH$  conversion and CO molar concentration during long term ESR test for R-LBMNCu-NFs catalyst at 600 °C a W/E ratio of 3.
